# Supplementary material
Source: PubMed Central journal article supplement (PMC4192037)
Supplement: NIHMS615160-supplement-01.pdf [file NIHMS615160-supplement-01.pdf]

**Table S1, related to Figure 1.** Effects of deleting  $\beta$ Klotho in nervous system on metabolic parameters.

|                             | <i>Klb<sup>fl/fl</sup></i> | <i>Klb<sup>fl/fl</sup>/Tg</i> | <i>Klb<sup>Camk2a</sup></i> | <i>Klb<sup>Camk2a</sup>/Tg</i> |
|-----------------------------|----------------------------|-------------------------------|-----------------------------|--------------------------------|
| Plasma Glucose (mg/dl)      | 194±22                     | 152±4.4*                      | 172±11                      | 195±16                         |
| Plasma Insulin (ng/ml)      | 46.6±22                    | 2.0±0.3*                      | 30.2±15                     | 48.3±25                        |
| Plasma Cholesterol (mg/dl)  | 303±19                     | 178±13*                       | 256±20                      | 259±20                         |
| Plasma Triglyceride (mg/dl) | 77.3±1.1                   | 68.6±3.8                      | 83.6±3.2                    | 85.3±5.2                       |
| Plasma Leptin (ng/ml)       | 70.1±9.1                   | 25.8±7.8*                     | 50.3±4.6                    | 65.8±6.8                       |
| Hepatic Cholesterol         | 3.7±0.4                    | 2.5±0.1*                      | 2.9±0.2                     | 3.3±0.3                        |
| Hepatic Triglyceride        | 86.9±17                    | 14.7±2.9*                     | 51.3±9.0                    | 70.0±16                        |

Measurements were made after 3 months on the high fat diet. Data are shown as the mean  $\pm$  S.E.M. n=8-13/group. \*p<0.05 compared to control (*Klb<sup>fl/fl</sup>* or *Klb<sup>Camk2a</sup>*).

Figure S1

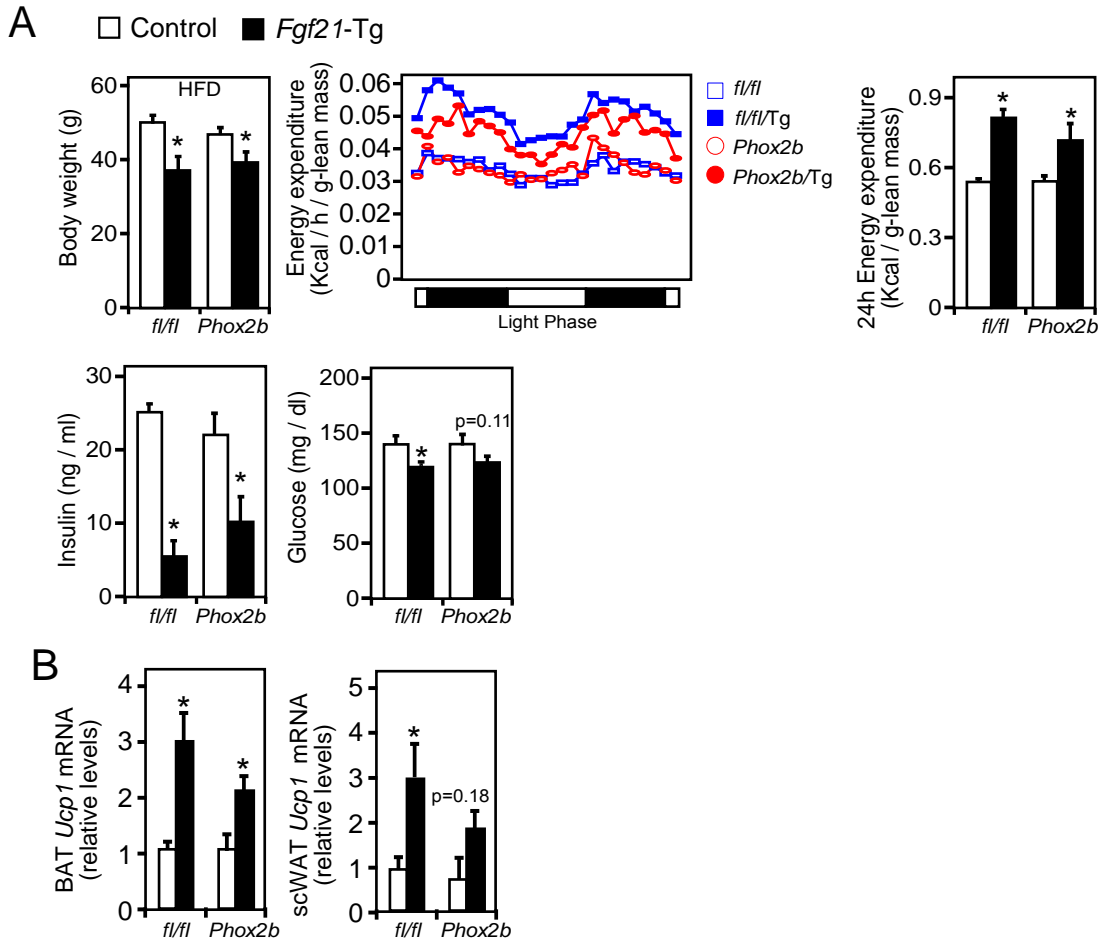

Figure S2

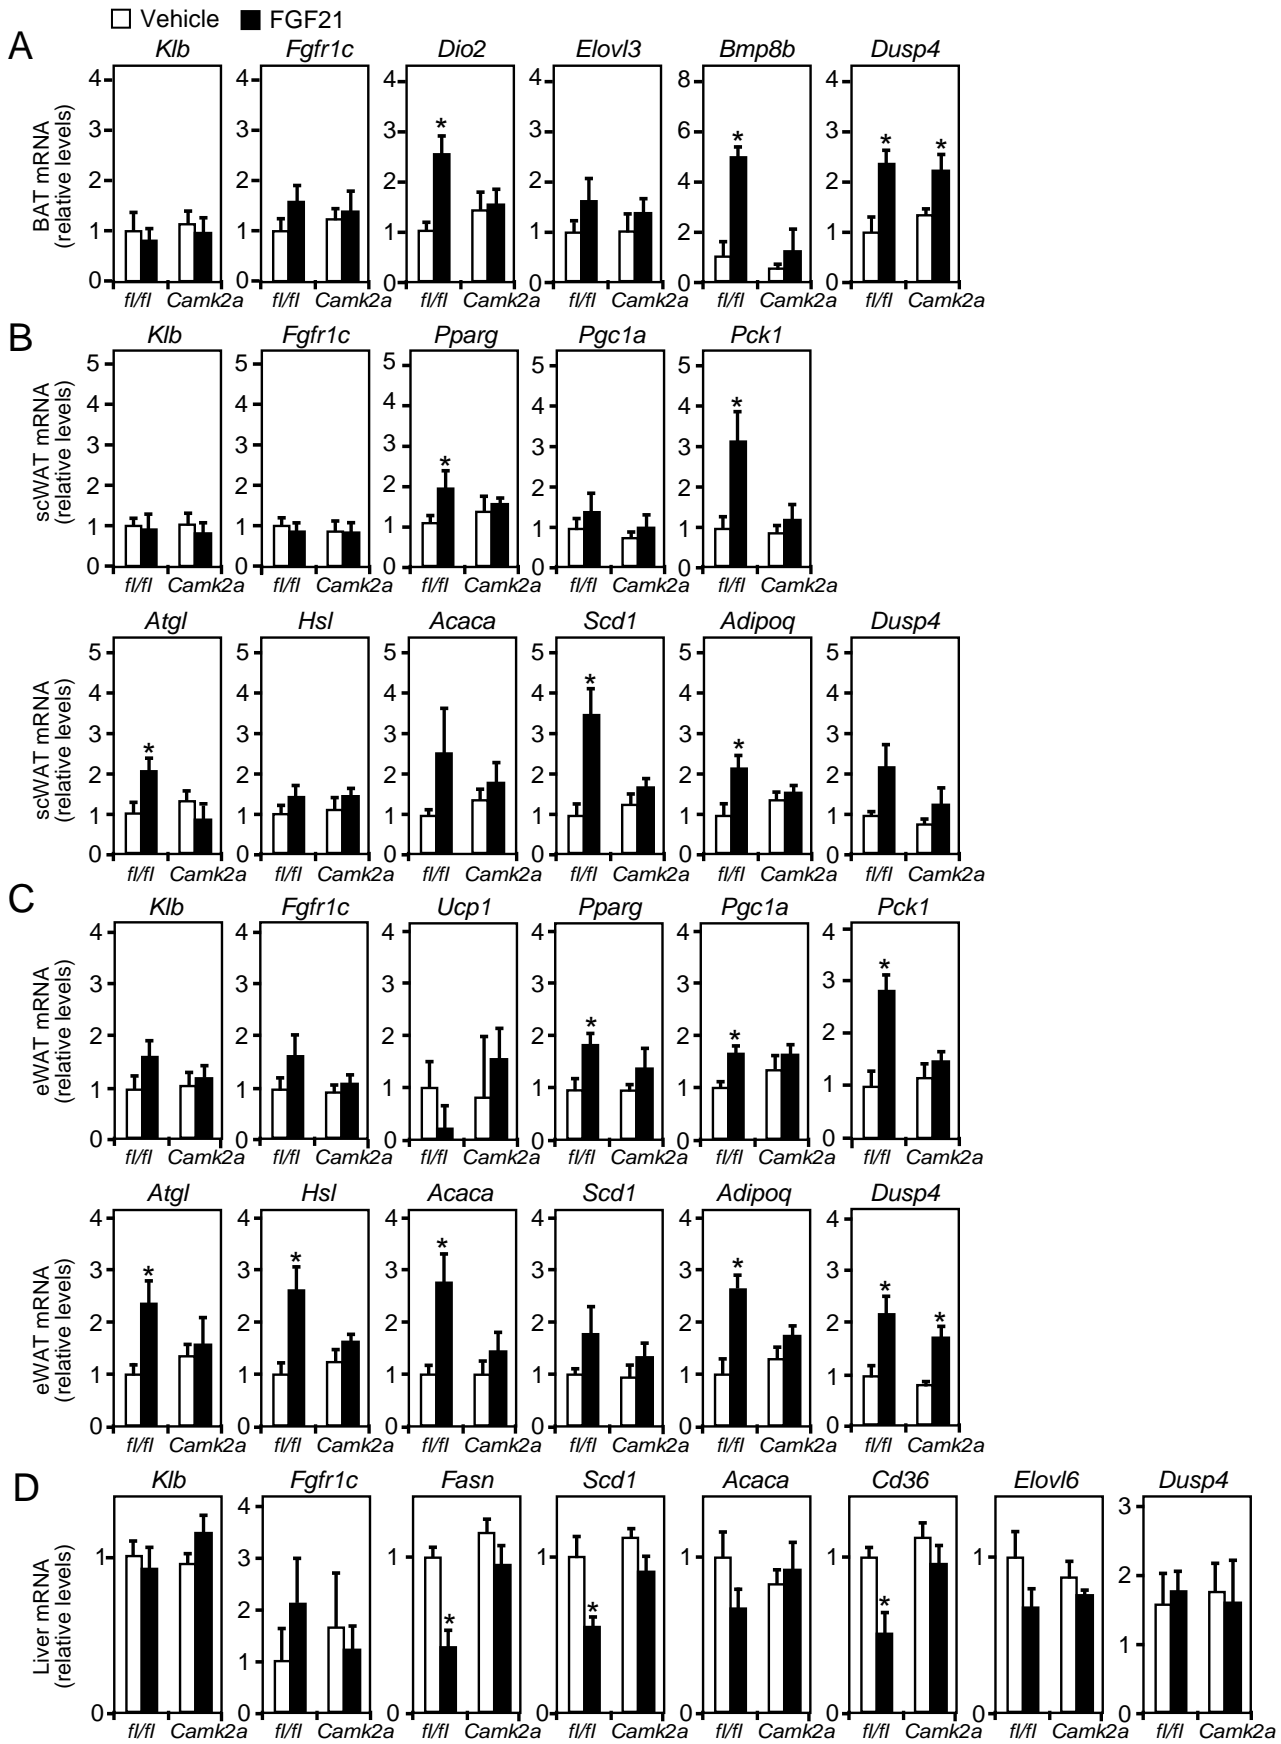

**Figure S1, related to Figure 1. FGF21 does not affect metabolic parameters in *Klb<sup>Phox2b</sup>* mice.**

(A) Body weight was measured in groups of *Klb<sup>fl/fl</sup>*, *Klb<sup>fl/fl</sup>/Tg*, *Klb<sup>Phox2b</sup>* and *Klb<sup>Phox2b</sup>/Tg* mice after 3 months on high fat diet (HFD). 24 hour heat production was measured starting 24 hours after switching mice to the HFD. Plasma insulin and glucose concentrations were made after 3 months on the HFD.

(B) Uncoupling protein 1 (*Ucp1*) gene expression was measured by QPCR in brown adipose tissue (BAT) and subcutaneous white adipose tissue (scWAT) in groups of *Klb<sup>fl/fl</sup>*, *Klb<sup>fl/fl</sup>/Tg*, *Klb<sup>Phox2b</sup>* and *Klb<sup>Phox2b</sup>/Tg* mice after 3 months on the HFD.

Data are the mean  $\pm$  S.E.M. n=6-7/group. \*p<0.05 compared to control.

**Figure S2, related to Figure 3. *Klb* expression in the nervous system is required for the effects of recombinant FGF21 on gene expression in diet-induced obese mice.**

(A-D) Gene expression was analysed by QPCR in (A) brown adipose tissue (BAT), (B) subcutaneous (sc) white adipose tissue (WAT), (C) epididymal (e) WAT, and (D) liver of *Klb<sup>fl/fl</sup>* and *Klb<sup>Camk2a</sup>* mice administered either recombinant FGF21 (0.8 mg/kg/day) or vehicle by osmotic minipump for 2 weeks.

Data are the mean  $\pm$  S.E.M. n=5-6/group. \*p<0.05 compared to vehicle.
